# Supplementary material for: CARBON-DISC 1.0 – A coupled, process-based model of global in-stream carbon biogeochemistry
Source: Copernicus journal article supplement (doi:10.5194/gmd-2019-205), 2019-09-17
Supplement: Supplementary file 1 [file gmd-2019-205-supplement.pdf]

# Supplementary material overview

## A coupled, process-based model of global in-stream carbon biogeochemistry

- 5 W.J. van Hoek<sup>1</sup>, L. Vilmin<sup>1</sup>, A.H.W. Beusen<sup>1,2</sup>, J.M. Mogollón<sup>4</sup>, X. Liu<sup>1</sup>, J.J. Langeveld<sup>1</sup>, A.F. Bouwman<sup>1,2,3</sup>, J.J. Middelburg<sup>1</sup>

<sup>1</sup> Department of Earth Sciences, Utrecht University, P.O. Box 80021, 3508TA Utrecht, the Netherlands.

<sup>2</sup> PBL Netherlands Environmental Assessment Agency, P.O. Box 30314, 2500GH the Hague, the Netherlands.

- 10 <sup>3</sup> Laboratory of Marine Chemistry Theory and Technology, Ministry of Education, Ocean University of China, Qingdao 266100, PR China.

<sup>4</sup> Department of Industrial Ecology, Leiden University, P.O. Box 9518, 2300RA Leiden, the Netherlands.

Correspondence to: a.f.bouwman@pbl.nl

### 15 **Agreement**

- The CARBON-DISC 1.0 source code and output data is archived on Zenodo (van Hoek et al., 2019) and enables to reproduce the results as presented in the main article. Anyone can use these files for noncommercial academic research only. If you want to make use of the global data, get in touch and we will talk. We would appreciate a short description of what you are planning to do with the data. If you feel that the global data set is a major contribution to your research, we would like to be co-author on any manuscript. If the data is being included in a published manuscript, we would like to see a preprint before submission to make sure the data description is correct. The following directories are accessible on Zenodo (DOI: 10.5281/zenodo.3402473).

### **A source\_code**

- 25 Contains all source code and accompanying initialization files necessary to run CARBON-DISC 1.0. Instructions to run the model are found in *README.txt*. The core part of CARBON-DISC 1.0 is found in *reactions.py*. The interactions in this script are calculated for all waterbodies (i.e. streams, lakes, reservoirs and floodplains) for all the C species in the three accompanied *specie.ini* files (*mon\_abio\_default.ini*, *mon\_resp\_default.ini*, *mon\_bio\_default.ini*) in the ini directory.

## **B model\_input**

- 30 Contains all input data in NETCDF format, necessary to run the CARBON DISC module and to reproduce results discussed in the main text. Global data has been masked to the Rhine basin.

## **C raw\_output\_data**

Contains the raw output data of concentrations of C species and fluxes of C species of the 6<sup>th</sup> order and higher in NETCDF format. Model output of smaller orders is available upon request.

## 35 **D Data for figures**

Contains the aggregated output data to be able to reproduce figures of the main article.

## **E Validation data**

Contains csv files to assess validation results.

## **F Sensitivity analysis**

- 40 Contains the raw output table in text format of the used Latin Hypercube Sampling method.  
Contains the excel file that extracts the relevant results for this article, with the dominant sensitivities highlighted. Positively correlated sensitivities are colored in green, negatively correlated sensitivities are colored in red. Small sensitivities, an SRC  $> -0.2$  and SRC  $< 0.2$ , are not highlighted.

## 45 **References**

van Hoek, W. J., Vilmin, L., Beusen, A., J., M., Langeveld, J., Bouwman, A. F. and Middelburg, J. J.: Release version 1 of the CARBON-Dynamic In Stream Chemistry model, , doi:10.5281/ZENODO.3402473, 2019.
